# Supplementary material
Source: publisher figshare collection journal article supplement (https://acs.figshare.com/ndownloader/files/12379505)
Supplement: Supplementary file 1 [file 12379505]

**Supporting inforamtion**

**Synthesis and Characterization of the Aurivillius Phase CoBi2O2F4**

Eleni Mitoudi Vagourdia, Silvia Müllnerb, Peter Lemmensb, Reinhard K. Kremerc,

Mats Johnssona*

a) Department of Materials and Environmental Chemistry, Stockholm University, SE-106 91 Stockholm, Sweden

b) Institute for Physics of Condensed Matter, TU Braunschweig, D-38106 Braunschweig, Germany

c) Max Planck Institute for Solid State Research, Heisenbergstrasse 1, D-70569 Stuttgart, Germany

* Corresponding author ([mats.johnsson@mmk.su.se](mailto:mats.johnsson@mmk.su.se))

**Table S1**

Atomic coordinates and equivalent isotropic displacement parameters (Å2) for CoBi2O2F4.

| Atom | x | y | z | U(eq) |
| --- | --- | --- | --- | --- |
| Bi(1) | 0.5000 | 0.5000 | 0.32714 (4) | 0.0090(2) |
| Co(1) | 0.0000 | 0.0000 | 0.5000 | 0.0063(6) |
| F(1A) | 0.091(13) | -0.088(14) | 0.381(4) | 0.010(6) |
| F(1B) | 0.073(14) | 0.057(19) | 0.376(4) | 0.010(6) |
| F(2A) | 0.069(10) | 0.494(15) | 0.537(3) | 0.014(5) |
| F(2B) | 0.118(10) | 0.494(11) | 0.477(2) | 0.014(5) |
| O(1) | 0.5000 | 0.0000 | 0.2500 | 0.006(7) |
| O(2) | 0.0000 | 0.5000 | 0.2500 | 0.012(8) |

**Table S2**

Selected bond Lengths (Å) and Angles (o) for CoBi2O2F4.

| Bi1—O1(x2) | 2.2980(4) | Co1—F1B(x4) | 2.059(60) |
| --- | --- | --- | --- |
| Bi1—O2(x2) | 2.2980(4) | Co1—F2A(x4) | 2.011(57) |
| Bi1—F1A (x2) | 2.398(58) | Co1—F2A(x4) | 2.053(57) |
| Bi1—F1B(x2) | 2.495(55) | Co1—F2B(x4) | 1.986(44) |
| Co1—F1A(x4) | 2.002 (68) | Co1—F2B(x4) | 2.033(43) |

**Table S3**

Bond valence sum (BVS) calculation results for CoBi2O2F4

| **Atoms** | **Bonding Distance** | **Bond Valence** | **Atoms** | **Bonding Distance** | **Bond Valence** |
| --- | --- | --- | --- | --- | --- |
| Bi1—O1(x2) | 2.2980(4) | 0.865 | F1A—Co1 | 2.002(68) | 0.374 |
| Bi1—O2(x2) | 2.2980(4) | 0.865 | F1A—Bi1 | 2.398(58) | 0.331 |
| Bi1—F1A(x2) | 2.398(58) | 0.5 |  |  | **0.70** |
| Bi1—F1B(x2) | 2.495(55) | 0.66 | F1B—Co1 | 2.059(60) | 0.321 |
|  |  | **3.40** | F1B—Co1 | 2.495(55) | 0.255 |
|  |  |  |  |  | **0.58** |
| Co—F1A(x4) | 2.002(68) | 0.375 | F2A—Co1 | 2.011(57) | 0.321 |
| Co—F1B(x4) | 2.059(60) | 0.323 | F2A—Co1ii | 2.053(57) | 0.366 |
| Co—F2A(x4) | 2.053(57) | 0.327 |  |  | **0.68** |
| Co—F2A(x4) | 2.011(57) | 0.366 |  |  |  |
| Co—F2B(x4) | 1.986(44) | 0.785 | F2B—Co1 | 1.986(44) | 0.388 |
| Co—F2B(x4) | 2.033(43) | 0.345 | F2B—Co1ii | 2.033(43) | 0.348 |
|  |  | **2.13** |  |  | **0.74** |
|  |  |  |  |  |  |
| O1—Bi1 | 2.298(4) | 0.576 |  |  |  |
| O1—Bi1xi | 2.298(4) | 0.576 |  |  |  |
| O1—Bi1xii | 2.298(4) | 0.576 |  |  |  |
| O1—Bi1xiii | 2.298(4) | 0.576 |  |  |  |
|  |  | **2.30** |  |  |  |


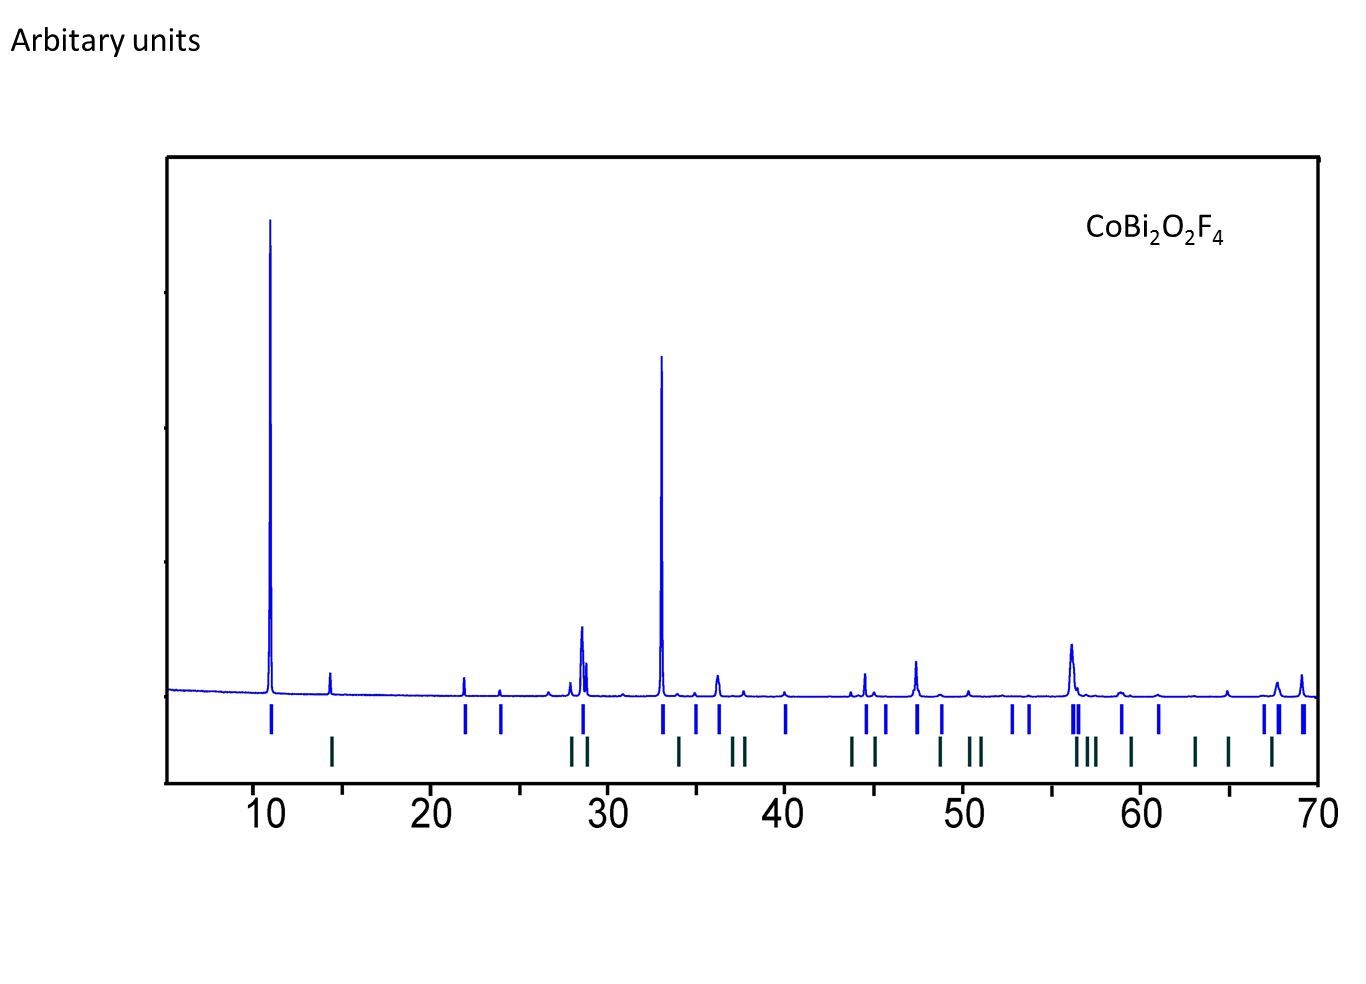


Figure S1 Experimental powder pattern of the CoBi2O2F4 compound and the Bragg peak assignment for the calculated pattern. The blue lines correspond to the CoBi2O2F4 phase and the green lines correspond to a minor BiOF impurity phase.
